# Supplementary material for: ATP-dependent helicase activity is dispensable for the physiological functions of Recql4
Source: PubMed Central journal article supplement (PMC6636780; doi:10.1371/journal.pgen.1008266), 2019-07-05
Supplement: pgen.1008266.s004.pdf [file pgen.1008266.s004.pdf]

**S1 Table. FACS Antibodies (anti-mouse)**

| <b>Antibody (clone)</b>        | <b>Conjugate</b> | <b>Catalogue #</b> | <b>Company</b>                                    |
|--------------------------------|------------------|--------------------|---------------------------------------------------|
| Ter119 (TER-119)               | PE               | 12-5921-83         | Life Technologies Australia Pty Ltd/Thermo Fisher |
| CD71 (RI7 217.1.4)             | APC              | 17-0711-82         | Life Technologies Australia Pty Ltd/Thermo Fisher |
| B220/CD45R (RA3-6B2)           | APC              | 17-0452-83         | Life Technologies Australia Pty Ltd/Thermo Fisher |
| IgM (II/41)                    | Biotin           | 13-5790-82         | Life Technologies Australia Pty Ltd/Thermo Fisher |
| CD43 (S7)                      | PE               | 553271             | BD Pharmingen                                     |
| CD19 (1D3)                     | PerCP-Cy5.5      | 45-0193-82         | Life Technologies Australia Pty Ltd/Thermo Fisher |
| Mac1/CD11b (M1/70)             | PE               | 12-0112-83         | Life Technologies Australia Pty Ltd/Thermo Fisher |
| Gr-1/Ly6G (RB6-8C5)            | PE-Cy7           | 25-5931-82         | Life Technologies Australia Pty Ltd/Thermo Fisher |
| F4/80 (BM8.1)                  | APC              | 20-4801-U100       | Tonbo Biosciences                                 |
| CD4 (RM4-5)                    | eFluor-450       | 48-0042-82         | Life Technologies Australia Pty Ltd/Thermo Fisher |
| CD8a/Ly-2 (53-6.7)             | APC-eFluor 780   | 47-0081-82         | Life Technologies Australia Pty Ltd/Thermo Fisher |
| TCRb (H57-597)                 | PE               | 12-5961-83         | Life Technologies Australia Pty Ltd/Thermo Fisher |
| CD25 (PC61.5)                  | PE               | 12-0251-83         | Life Technologies Australia Pty Ltd/Thermo Fisher |
| CD44 (IM7)                     | APC              | 17-0441-83         | Life Technologies Australia Pty Ltd/Thermo Fisher |
| Sca-1 (D7)                     | APC              | 17-5981-82         | Life Technologies Australia Pty Ltd/Thermo Fisher |
| c-Kit/CD117 (2B8)              | APC-eFluor-780   | 47-1171-82         | Life Technologies Australia Pty Ltd/Thermo Fisher |
| CD34 (RAM34)                   | eFluor-660       | 50-0341-82         | Life Technologies Australia Pty Ltd/Thermo Fisher |
| CD135/Flk2/Flt3 (A2F10)        | PE               | 12-1351-82         | Life Technologies Australia Pty Ltd/Thermo Fisher |
| FcgR/CD16/32 (93)              | PerCP-Cy5.5      | 45-0161-82         | Life Technologies Australia Pty Ltd/Thermo Fisher |
| CD41 (MWRReg30)                | eFluor-450       | 48-0411-82         | Life Technologies Australia Pty Ltd/Thermo Fisher |
| CD105 (MJ7/18)                 | PE-Cy7           | 120409             | Biologend                                         |
| CD150 (TC15-12F12.2)           | PE               | 115904             | Biologend                                         |
| CD23                           | Biotin*          | 553137             | BD Pharmingen                                     |
| CD21                           | PE               | 123410             | Biologend                                         |
| Streptavidin                   | BV 605           | 563260             | BD Pharmingen                                     |
| *Streptavidin (used with CD23) | BV 605           | 405229             | Biologend                                         |
